# Supplementary material for: Synthesis of chiral cyclic oligothiazolines: a novel structural motif for a macrocyclic molecule
Source: Royal Society of Chemistry journal article supplement (doi:10.1039/b601628f), 2006-01-01
Supplement: b601628f.pdf [file b601628f.pdf]

*Supporting information for*

**Synthesis of Chiral Cyclic Oligothiazolines: A Novel Chiral Structural Motif of  
Macrocyclic Molecule**

Fu She Han, Hiroyuki Osajima, Mui Cheung, Hidetoshi Tokuyama, and Tohru  
Fukuyama\*

*Graduate School of Pharmaceutical Sciences, University of Tokyo, and PRESTO, the  
Japan Science and Technology Agency (JST), 7-3-1 Hongo, Bunkyo-ku, Tokyo 113-0033,  
Japan*

**1. General procedure for the synthesis of cyclooligothiazolines **22**, **23** and **25****

BOP-Cl (2.0 eq.) and Et<sub>3</sub>N (4.0 eq.) were added to a solution of thiol carboxylic acid **19** (106 mg, 0.20 mmol) or **24** (135 mg, 0.31 mmol) in anhydrous CH<sub>2</sub>Cl<sub>2</sub> (4 mmol/L), and the mixture was stirred at ambient temperature for 18 to 20 h. The solution was then washed with 5% aq. NaHCO<sub>3</sub> and brine. Organic layer was dried over MgSO<sub>4</sub>, concentrated and purified by flash column chromatography (Hexane/EtOAc, 2:1) on silica gel to give a mixture of cyclooligomerization products (dimer and trimer in the case of **19**, trimer and tetramer in the case of **24**). The mixture was then treated with neat TFA at room temperature for 20 min, evaporated to dryness. The residue was dissolved in benzene and refluxed for 4 h, then evaporated to leave the crude products. The crude products were purified by PTLC (hexane/EtOAc 1:3) to give pure **22** (22.5 mg) and **23** (15.1 mg) in the case of **19**, and **23** (37.0 mg) and **25** (3.0 mg) in the case of **24**.

**2. Spectra data of compounds **22**, **23** and **25****

**Cyclic octa-(4-β-methyl)thiazoline **22**:**  $[\alpha]_D^{25} = -220$  (*c* 0.50, CHCl<sub>3</sub>); IR (film, cm<sup>-1</sup>) 2974, 2927, 2861, 1621, 1432, 1365, 1268, 1178, 1009, 908; <sup>1</sup>H-NMR (400 MHz, CDCl<sub>3</sub>, 25 °C, TMS)  $\delta$  = 3.70 (d, *J* = 10.8 Hz, 8 H), 3.19 (d, *J* = 10.8 Hz, 8 H), 1.63 (s, 24 H); <sup>13</sup>C-NMR (100 MHz, CDCl<sub>3</sub>, 25 °C)  $\delta$  = 175.7, 83.1, 43.6, 25.2; FABMS: [M<sup>+</sup>]: 793; HRMS Calcd. for C<sub>32</sub>H<sub>41</sub>N<sub>8</sub>S<sub>8</sub>: 793.1220; Found: 793.1205.

**Cyclic dodeca-(4- $\beta$ -methyl)thiazoline 23:**  $[\alpha]_D^{25} = -283$  (*c* 0.22, CHCl<sub>3</sub>); IR (film, cm<sup>-1</sup>) 2975, 2927, 2860, 1624, 1432, 1366, 1247, 1178, 1010, 907; <sup>1</sup>H-NMR (400 MHz, CDCl<sub>3</sub>, 25 °C, TMS)  $\delta$  = 3.76 (d, *J* = 10.8 Hz, 12 H), 3.01 (d, *J* = 10.8 Hz, 12 H), 1.76 (s, 36 H); <sup>13</sup>C-NMR (100 MHz, CDCl<sub>3</sub>, 25 °C)  $\delta$  = 176.6, 83.4, 43.0, 25.9; FABMS: [M]: 1188; HRMS Calcd. for C<sub>48</sub>H<sub>60</sub>N<sub>12</sub>S<sub>12</sub>: 1188.1712; Found: 1188.1730.

**Cyclic nona-(4- $\beta$ -methyl)thiazoline 25:**  $[\alpha]_D^{25} = -223$  (*c* 0.50, CHCl<sub>3</sub>); IR (film, cm<sup>-1</sup>) 2975, 2927, 2861, 1622, 1431, 1366, 1264, 1179, 1009, 907; <sup>1</sup>H-NMR (400 MHz, CDCl<sub>3</sub>, 25 °C, TMS)  $\delta$  = 3.75 (d, *J* = 11.2 Hz, 9 H), 3.22 (d, *J* = 11.2 Hz, 9 H), 1.62 (s, 27 H); <sup>13</sup>C-NMR (100 MHz, CDCl<sub>3</sub>, 25 °C)  $\delta$  = 175.7, 83.5, 43.3, 25.7; FABMS: [M<sup>+</sup>]: 892; HRMS Calcd. for C<sub>36</sub>H<sub>46</sub>N<sub>9</sub>S<sub>9</sub>: 892.1362; Found: 892.1318.

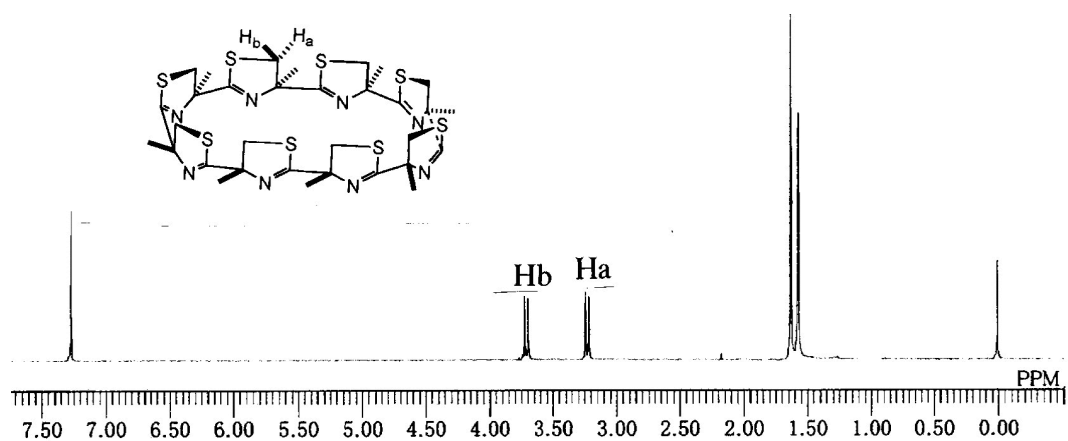

**Figure 1.**  $^1\text{H}$ -NMR of octathiazoline **22**

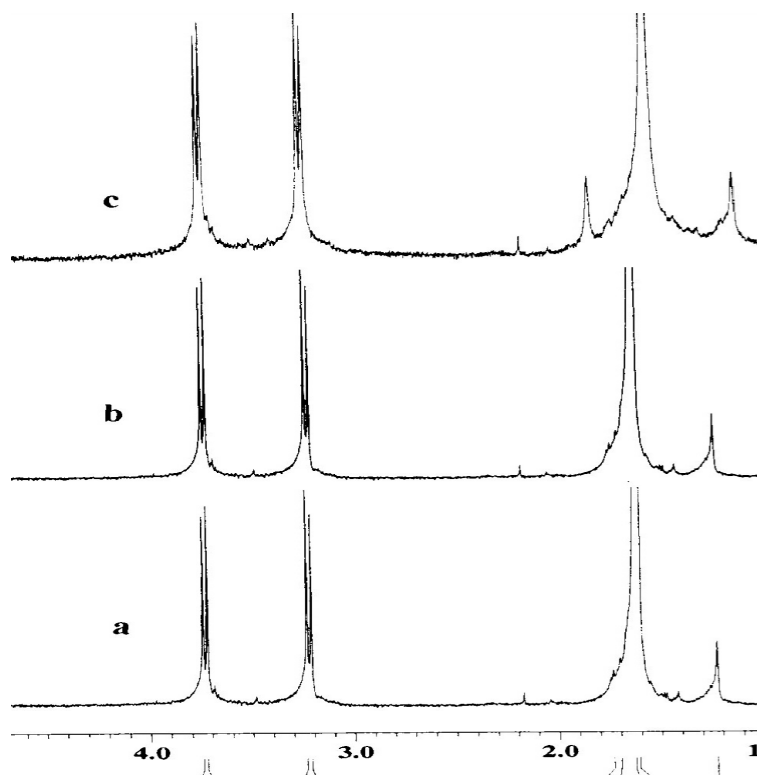

**Figure 2.** Variable-temperature  $^1\text{H}$ -NMR of dodecathiazoline **23** at : a) 0 °C; b) -30 °C; and c) -60 °C.

DFILE  
COMNT  
DATM  
OBNUC  
EXMOD  
OBFRQ  
OBSET  
OBFIN  
POINT  
FREQU  
SCANS  
ACQTM  
PD  
PW1  
IRNUC  
CTEMP  
SLVNT  
EXREF  
BF  
RGAIN

hfs02170aa  
08-06-2004 08:12:04  
13C  
single\_pulse\_dec  
100.53 MHz  
5.35 KHz  
5.86 Hz  
8192  
33068.78 Hz  
6000  
0.2477 sec  
1.5000 sec  
3.07 usec  
1H  
25.1 c  
CDCL3  
77.00 ppm  
0.12 Hz  
60

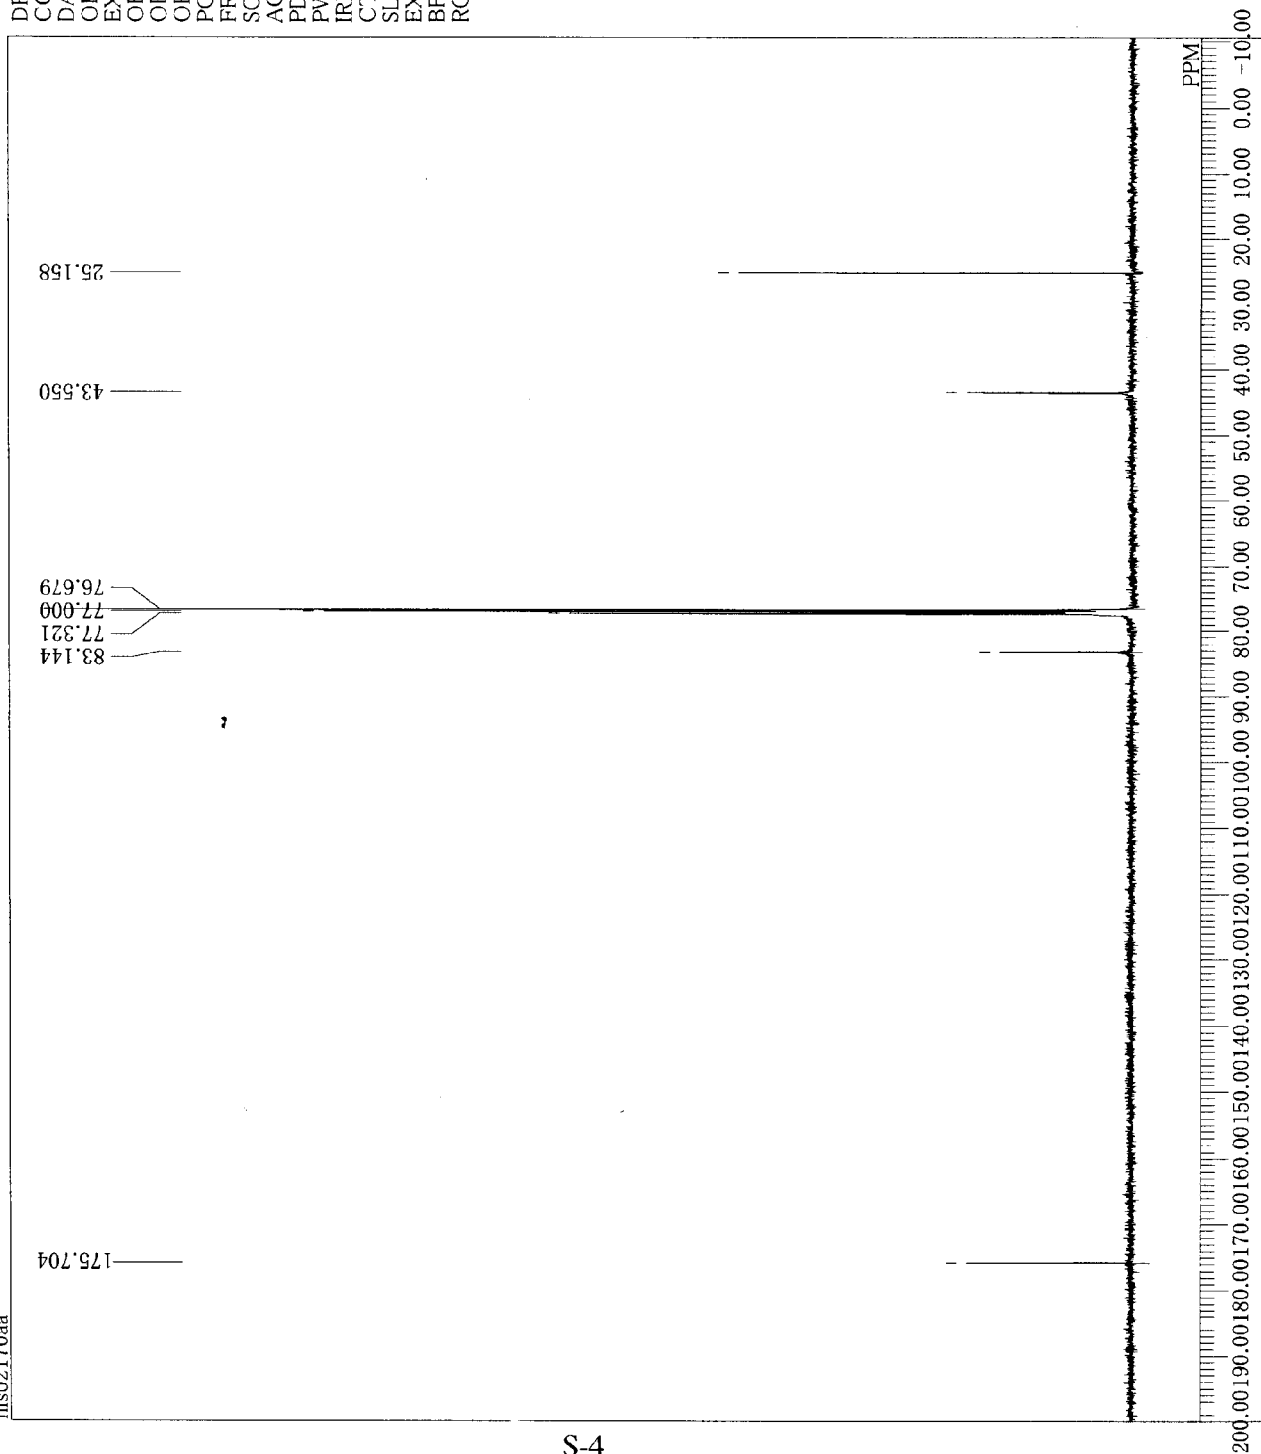

Figure 3. <sup>13</sup>C-NMR of octathiazoline 22

DFILE  
COMNT  
DATIM  
OBNUC  
EXMOD  
OBFRQ  
OBSET  
OBFIN  
POINT  
FREQU  
SCANS  
ACQTM  
PD  
PW1  
IRNUC  
CTEMP  
SLVNT  
EXREF  
BF  
RGAIN

C:\Users\han\hfs02052c.3  
hfs02052c  
23-04-2004 14:26:46  
1H  
single\_pulse.ex2  
399.78 MHz  
4.19 KHz  
7.29 Hz  
8192  
7503.00 Hz  
16  
1.0918 sec  
30.0000 sec  
6.00 uscc  
1H  
24.4 c  
C6D6  
7.26 ppm  
0.12 Hz  
44

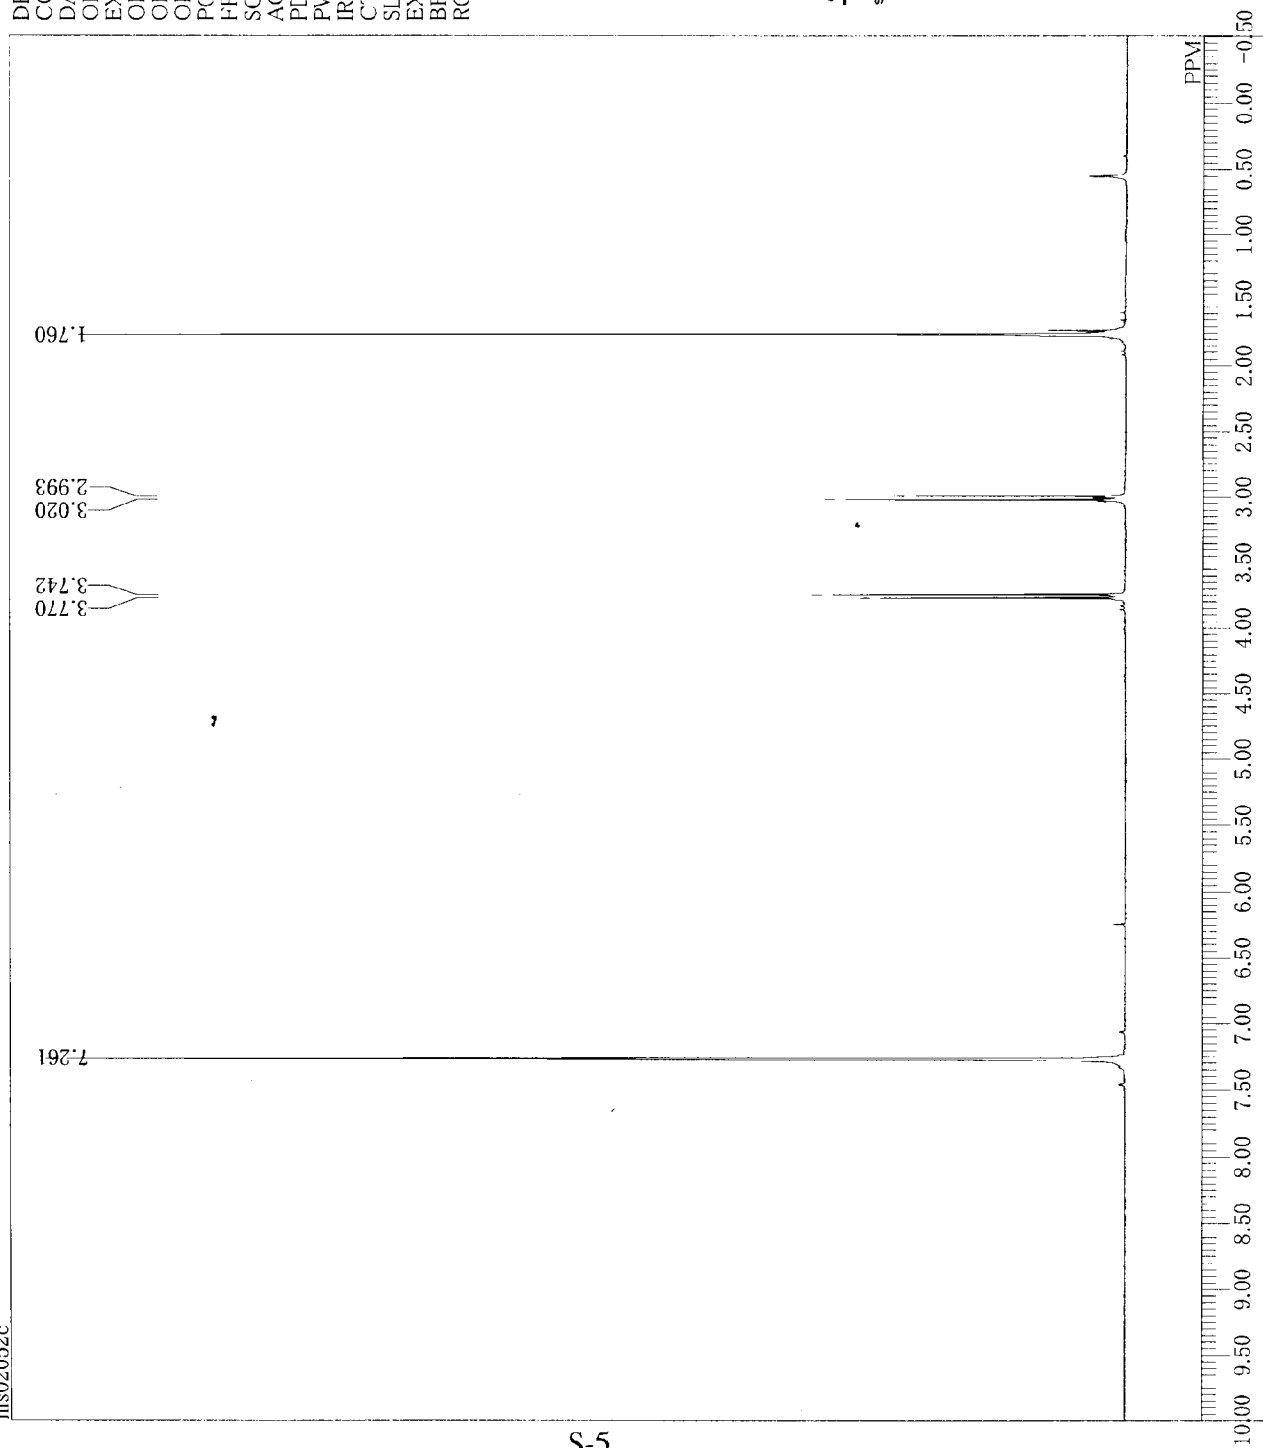

Figure 4. <sup>1</sup>H-NMR of dodecathiazoline 23

hfs02052b-bcm

DFILE  
COMNT  
DATIM  
OBNUC  
EXMOD  
OBFRQ  
OBSET  
OBFIN  
POINT  
FREQU  
SCANS  
ACQTM  
PD  
PW1  
IRNUC  
CTEMP  
SLVNT  
EXREF  
BF  
RGAIN

C:\Users\Yhan\hfs02052b-bcm.1  
hfs02052b-bcm  
02-03-2005 07:53:14  
13C  
single.pulse.dec  
100.53 MHz  
5.35 KHz  
5.86 Hz  
32768  
32938.08 Hz  
11200  
0.9948 sec  
1.5000 sec  
3.13 usec  
1H  
18.0 c  
CDCL3  
77.00 ppm  
0.12 Hz  
60

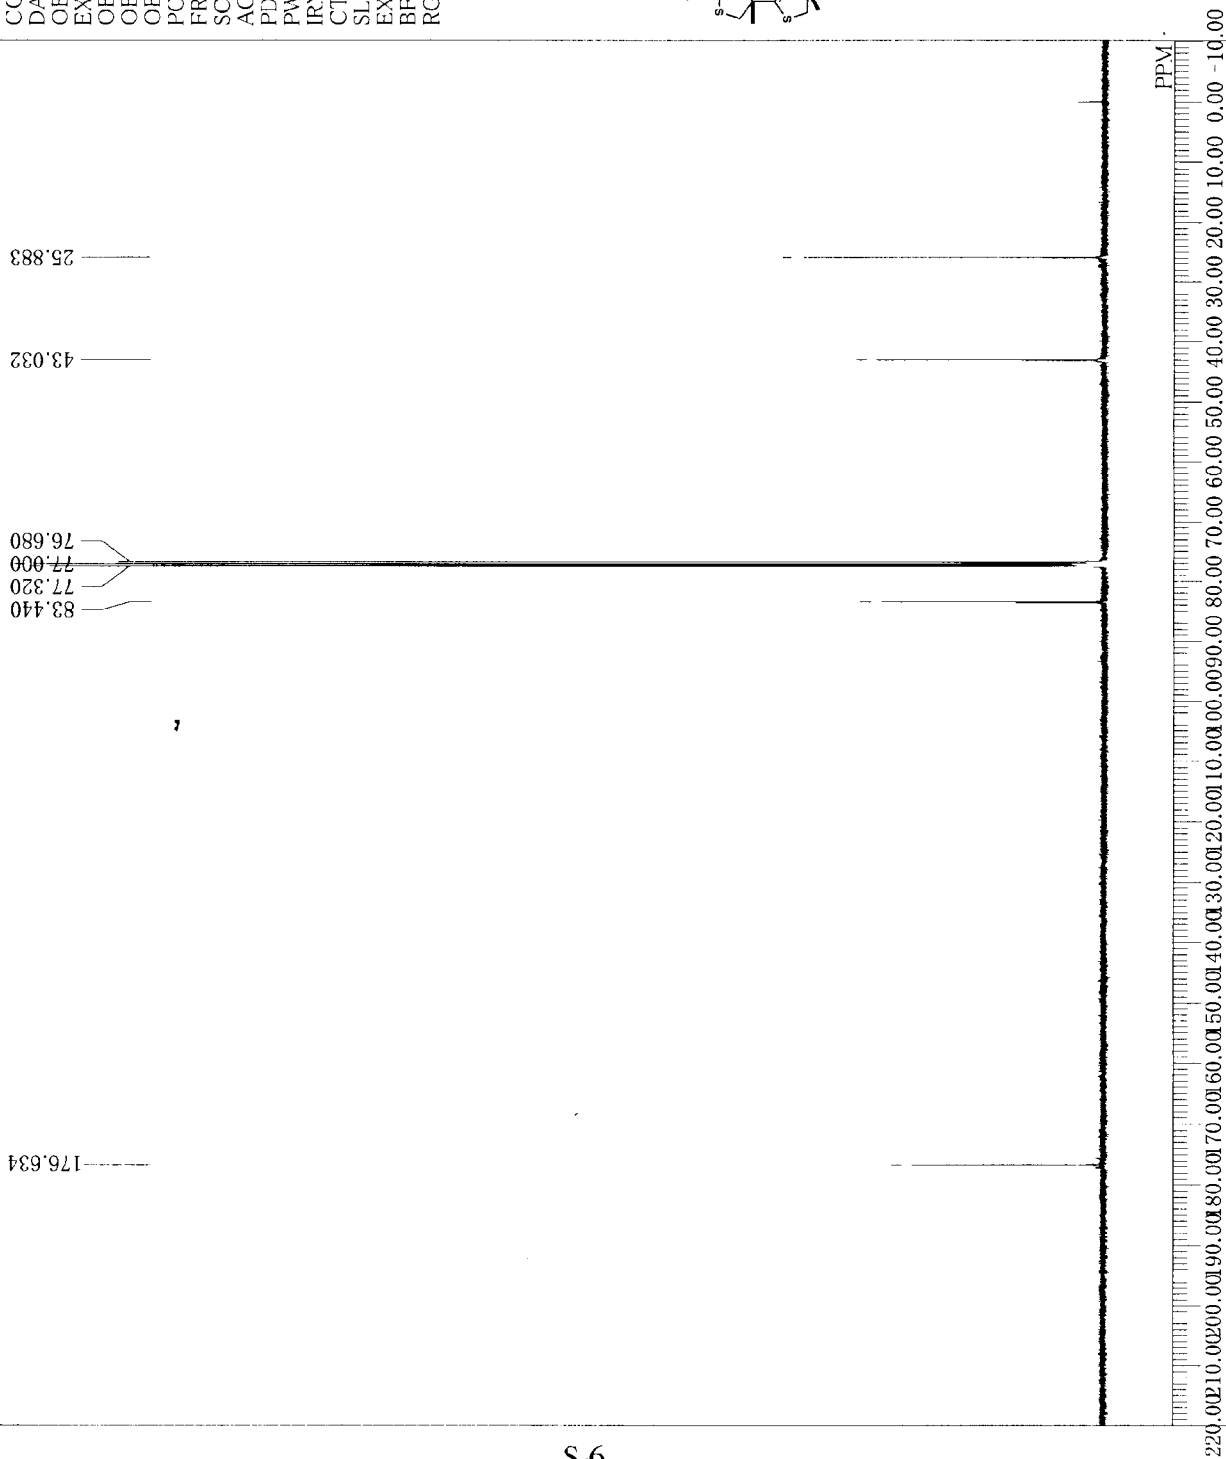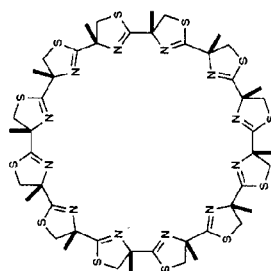

Figure 5. <sup>13</sup>C-NMR of dodecathiazoline 23

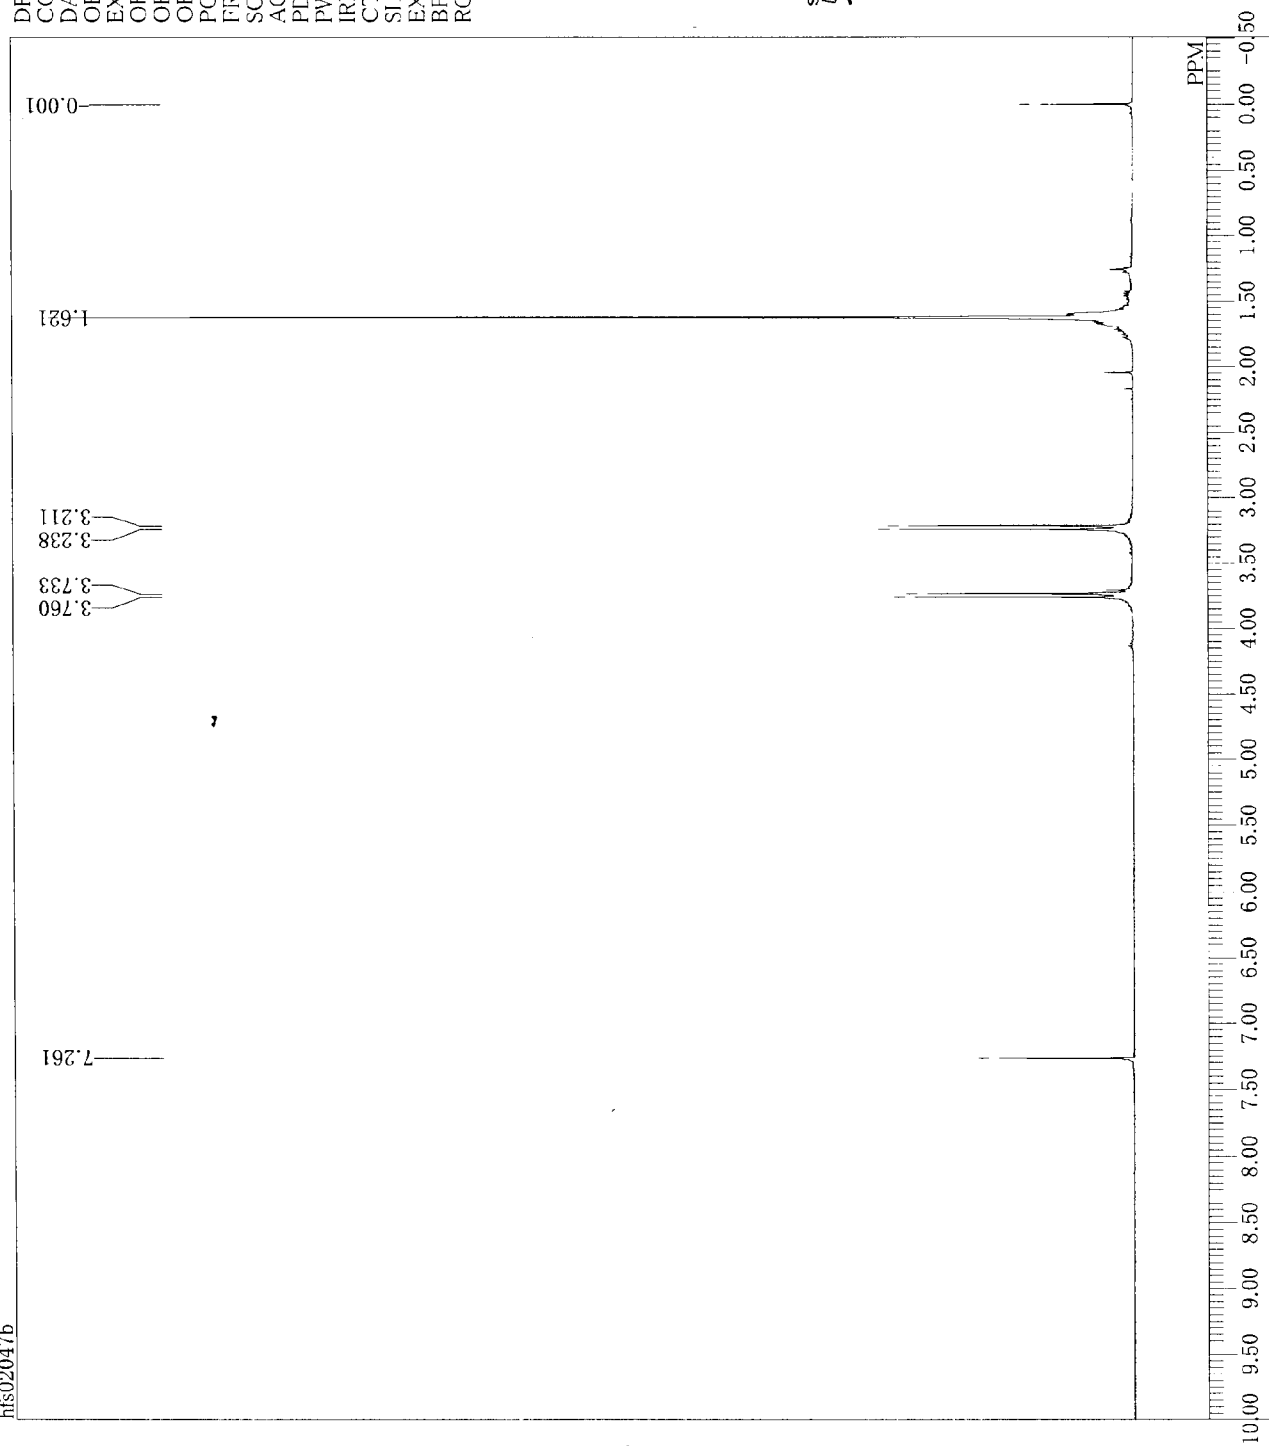

Figure 6.  $^1\text{H}$ -NMR of nonathiazoline **25**

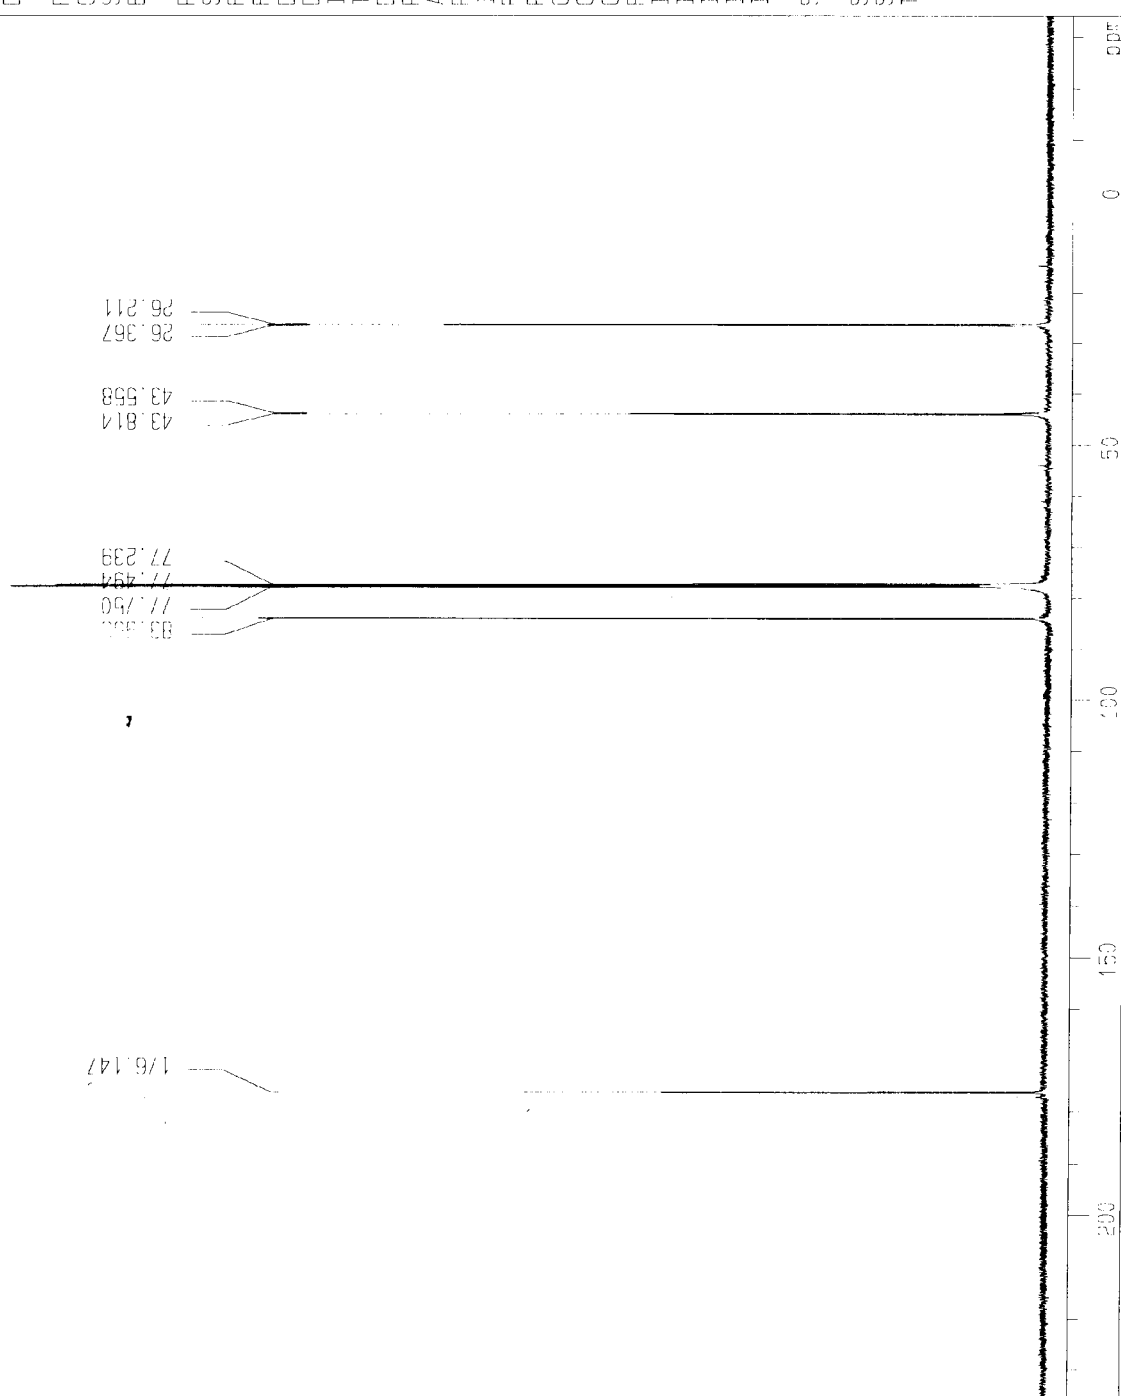

**Figure 7.**  $^{13}\text{C}$ -NMR of nonthiazoline **25**
